# Supplementary material for: Deciphering the parameters to produce highly reproducible and scalable iron oxide nanoparticles
Source: Royal Society of Chemistry journal article supplement (doi:10.1039/d2re00516f), 2023-01-01
Supplement: d2re00516f1.pdf [file d2re00516f1.pdf]

## Supplementary information

### Deciphering the parameters to produce highly reproducible and scalable Iron Oxide Nanoparticles.

Ashish Avasthi<sup>a</sup>, Carlos Caro<sup>a</sup>, María Luisa Garcia-Martin<sup>a,b\*</sup> and Manuel Pernia Leal<sup>c\*</sup>

<sup>a</sup> Instituto de Investigación Biomédica de Málaga y Plataforma en Nanomedicina (IBIMA Plataforma BIONAND), C/Severo Ochoa, 35, 29590 Málaga, Spain;

<sup>b</sup> Biomedical Research Networking Center on Bioengineering, Biomaterials & Nanomedicine, CIBER-BBN, Málaga, Spain;

<sup>c</sup> Departamento de Química Orgánica y Farmacéutica, Facultad de Farmacia, Universidad de Sevilla, 41012 Seville, Spain

\* Correspondence: mpernia@us.es; mlgarcia@bionand.es

Received: date; Accepted: date; Published: date

**Fig. S1:** Iron oxide nanoparticles when oleic acid concentration was tripled to original protocol

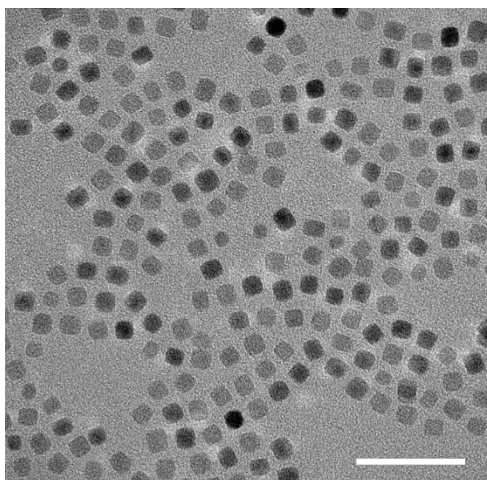

**Fig. S2:** Iron oxide nanoparticles synthesized at low ramp rate (1°C/min) with different iron oleate concentration

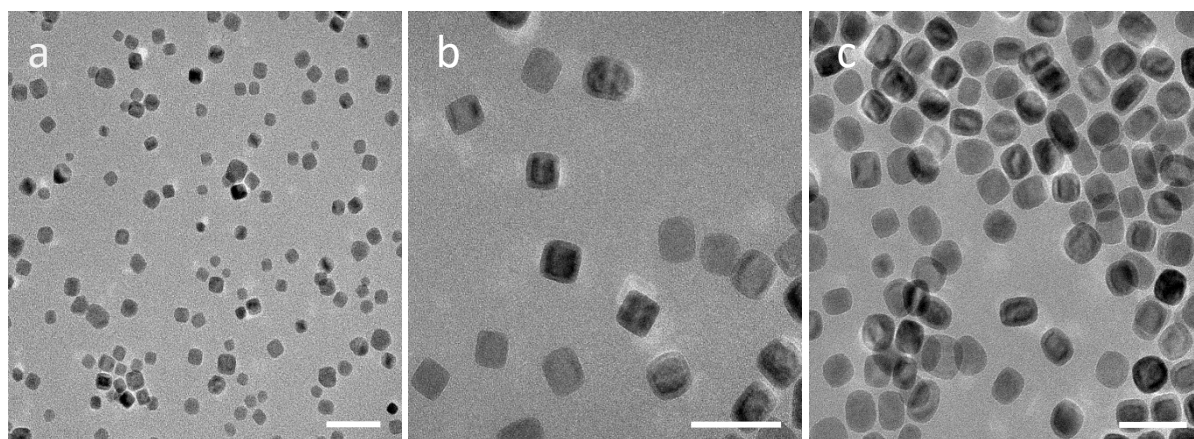

**Fig. S3:** Iron oxide nanoparticles synthesized at low ramp rate (1°C/min) with higher stirring speed

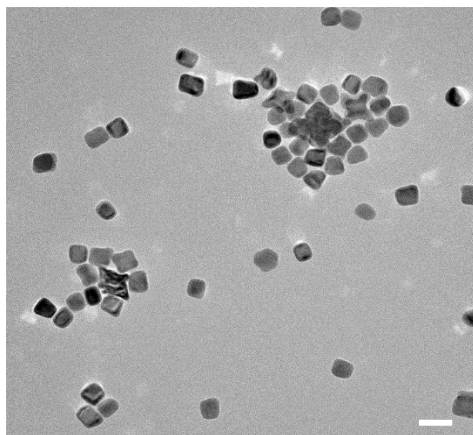

**Fig. S4:** Iron oxide nanoparticle when synthesized without vacuum cycle

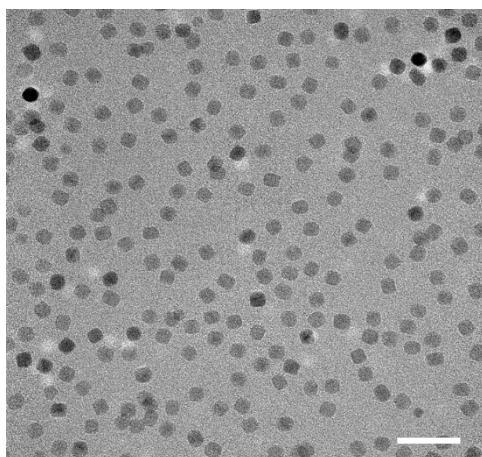

**Fig. S5:** Iron oxide nanoparticles synthesized at low ramp rate (1°C/min) with hexadecene as solvent at higher stirring speed showing  $9.6 \pm 0.80$  nm NPs

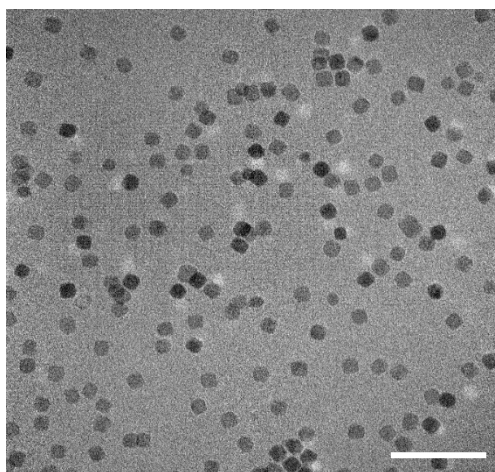

**Fig. S6:** Iron oxide nanoparticles synthesized with hexadecene as solvent at lower stirring speed showing polydisperse NPs that are difficult to separate

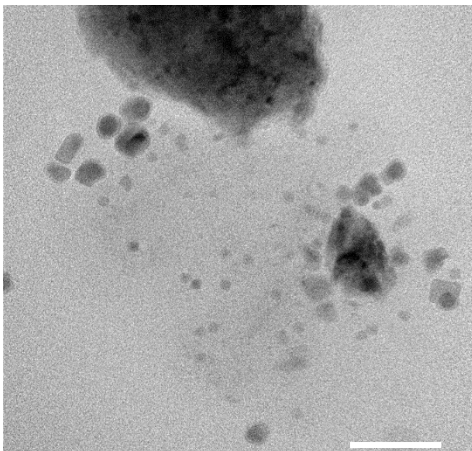

**Fig. S7:** Iron oxide nanoparticles synthesized with hexadecene scaled up 5x

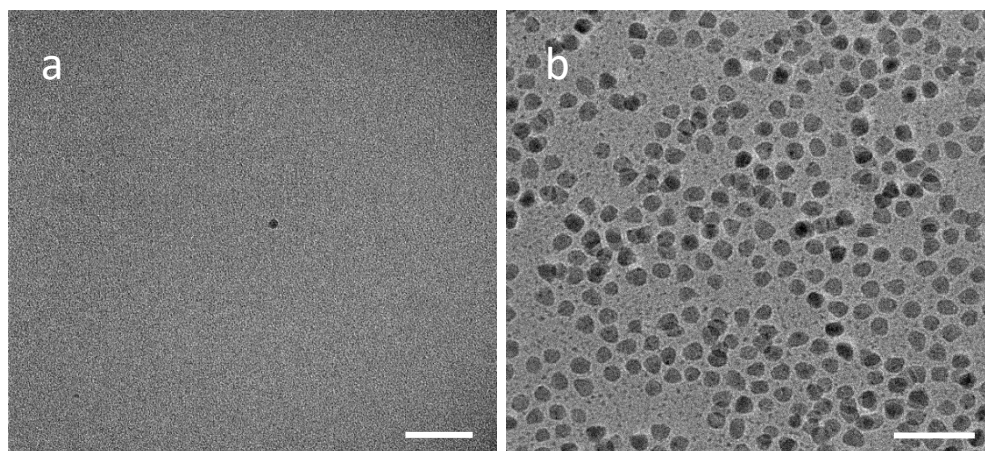

**Fig. S8:** Iron oxide nanoparticles synthesized in a mixture of benzyl ether and octadecene (1:1)

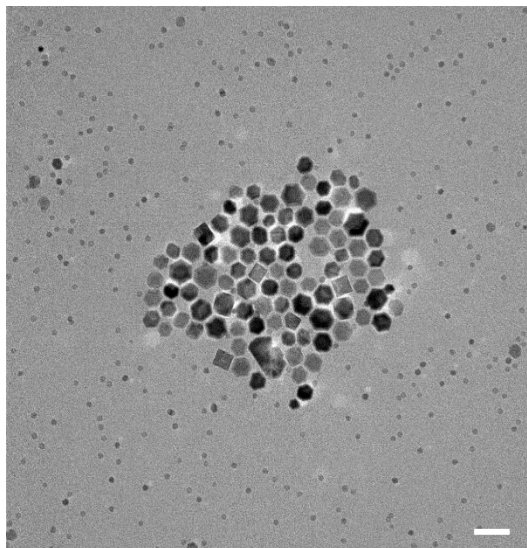

**Fig. S9:** Iron oxide nanoparticles synthesized with combination of octadecene and benzyl ether along with incorporation of oleyl alcohol at higher stirring speed (~1500 rpm)

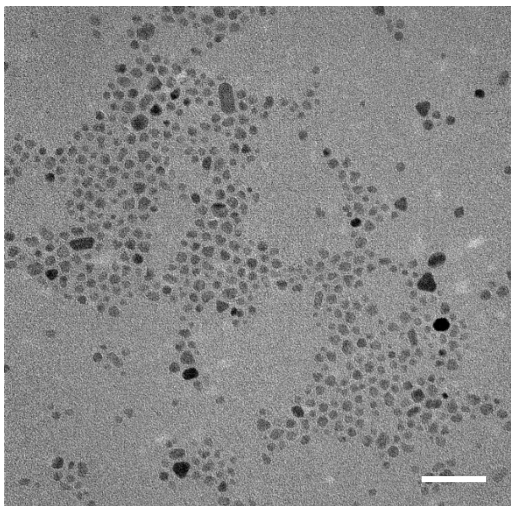

**Fig. S10:** Reproducibility of iron oxide nanoparticles synthesized with diphenyl ether along with incorporation of oleyl alcohol

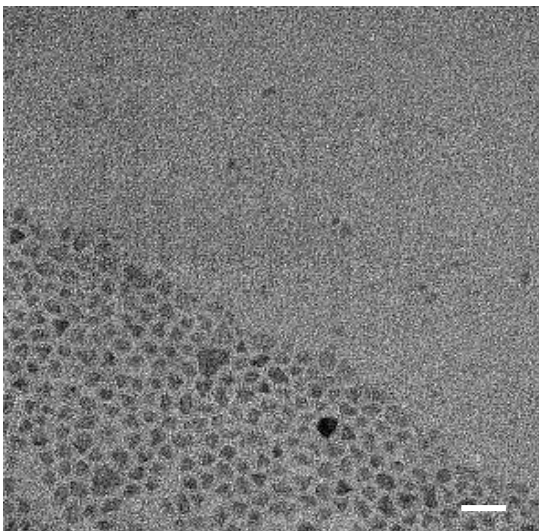

**Fig. S11:** FTIR of different iron oleates used (Yellow spectra – iron oleate was washed with ethanol instead of water)

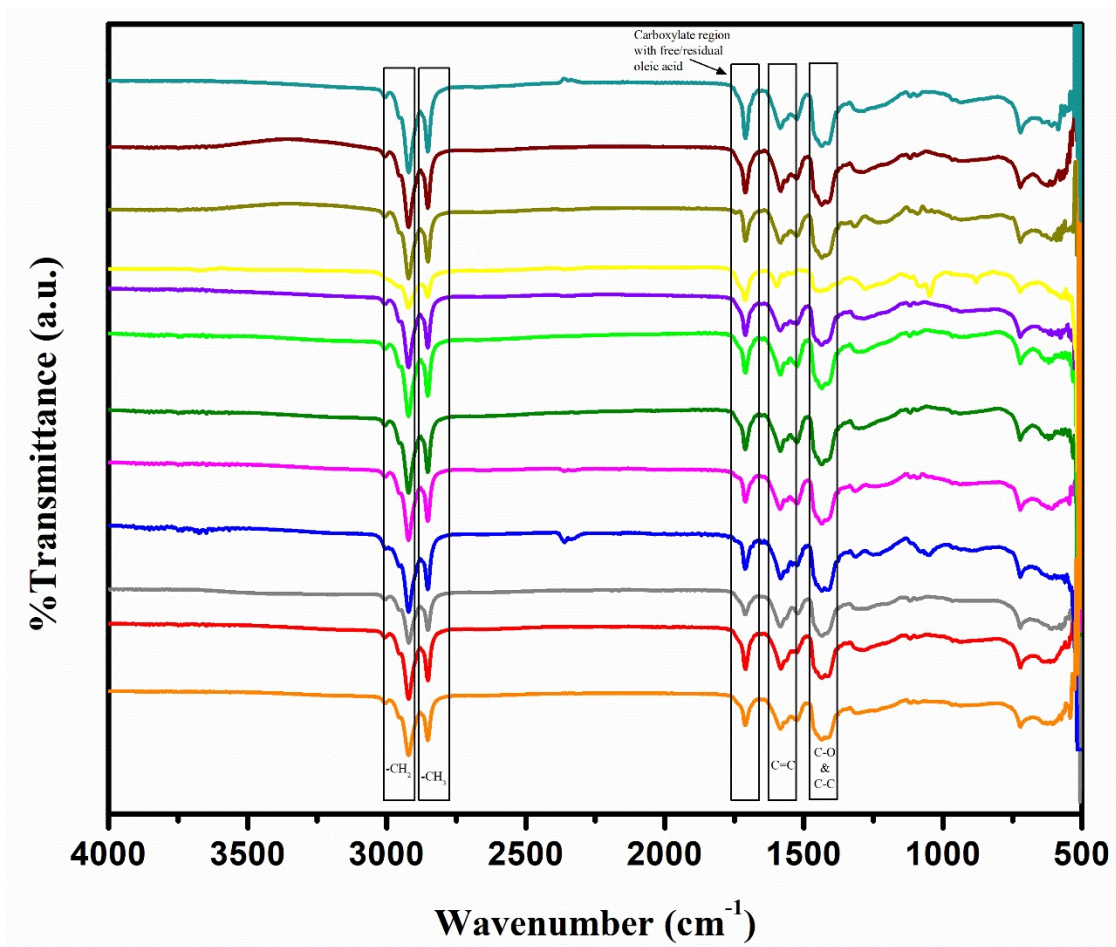

**Fig. S12:** Aliquots taken at different intervals from iron oleate and octadecene reactions

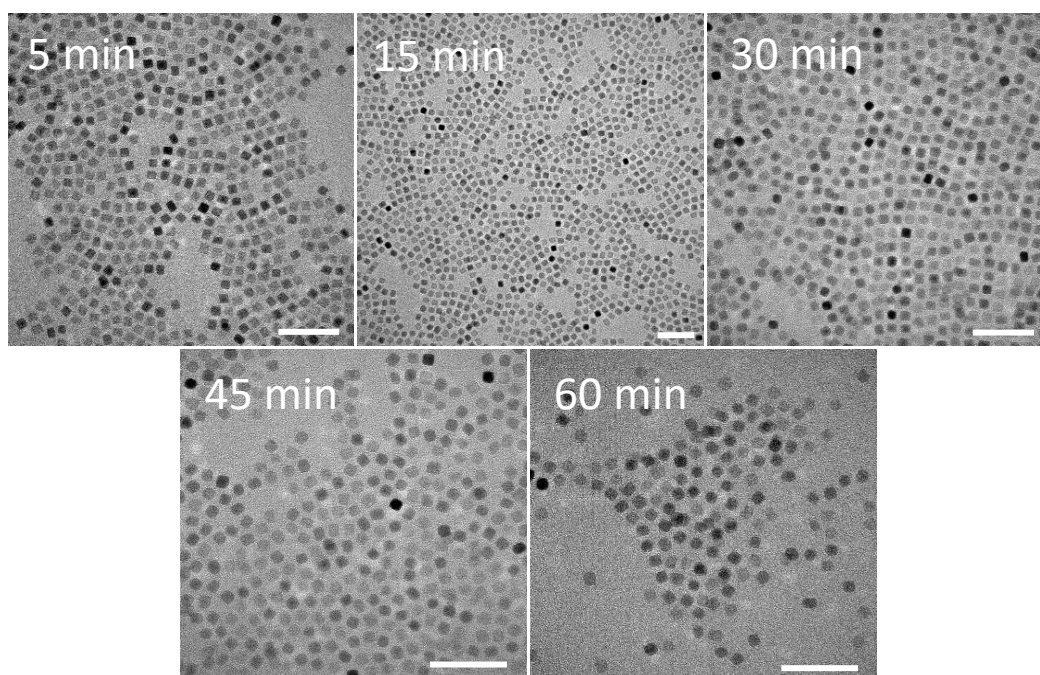

**Fig. S13:** Aliquots taken at different intervals from iron oleate and hexadecene reactions

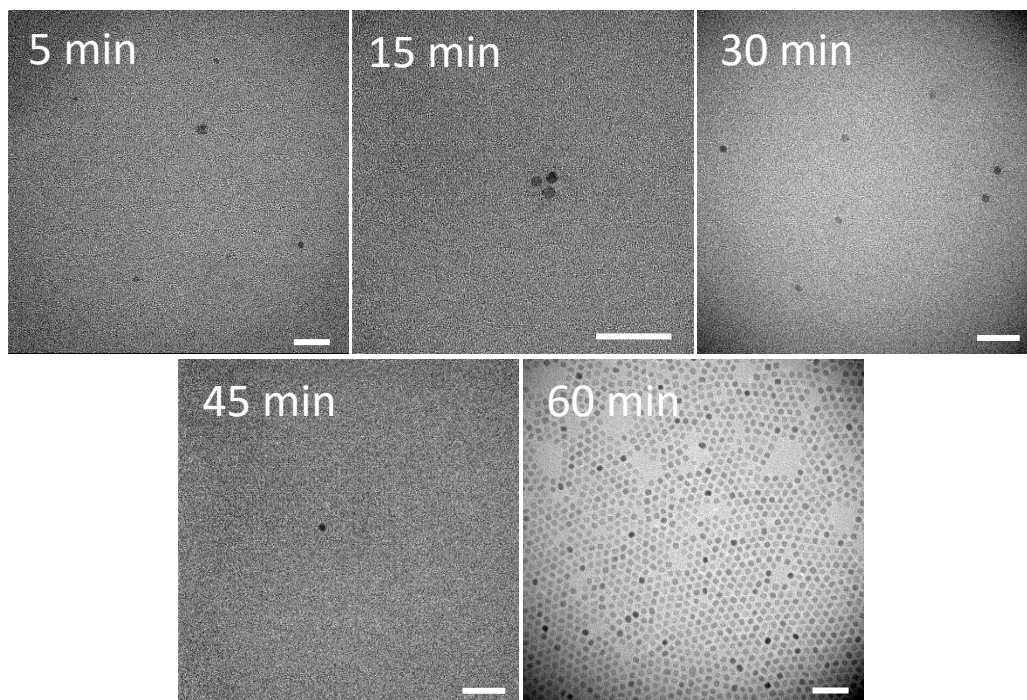

**Fig. S14:** Reaction conducted with iron oleate and octadecene at 250°C for 4 h

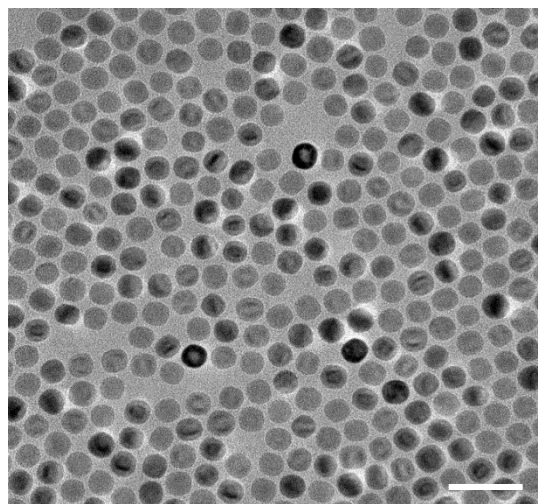

Table S1 Size of nanoparticles from Figure 1

| Figure number | Size (nm)      |
|---------------|----------------|
| 1a            | $9.8 \pm 0.5$  |
| 1b            | $9.3 \pm 0.8$  |
| 1c            | $8.7 \pm 0.9$  |
| 1d            | $8.6 \pm 0.7$  |
| 1e            | $9.2 \pm 0.7$  |
| 1f            | $8.5 \pm 0.7$  |
| 1g            | $9.0 \pm 0.8$  |
| 1h            | $11.0 \pm 3.0$ |
| 1i            | $9.5 \pm 1.2$  |
| 1j            | $17.7 \pm 1.1$ |
| 1k            | $17.6 \pm 8.8$ |
| 1l            | $35.2 \pm 6.1$ |
| 1m            | $8.4 \pm 1.1$  |
| 1n            | $9.1 \pm 0.9$  |
| 1o            | $9.5 \pm 1.2$  |
| 1p            | $7.1 \pm 0.5$  |
| 1q            | $11.3 \pm 6.2$ |
| 1r            | $12.6 \pm 7.2$ |
| 1s            | $15.2 \pm 5.1$ |
| 1t            | $18.3 \pm 2.8$ |

Table 2 Size of nanoparticles from Figure 2

| Figure number | Size (nm)     |
|---------------|---------------|
| 2a            | $8.2 \pm 0.8$ |
| 2b            | $8.2 \pm 0.6$ |
| 2c            | $7.2 \pm 0.4$ |
| 2d            | $6.4 \pm 0.5$ |
| 2e            | $7.2 \pm 0.5$ |
| 2f            | $7.6 \pm 0.7$ |
| 2g            | $7.4 \pm 0.6$ |
| 2h            | $9.2 \pm 0.6$ |
| 2i            | $7.5 \pm 0.4$ |

Table 3 Size of nanoparticles from Figure 3

| Figure number | Size (nm)      |
|---------------|----------------|
| 3a            | $6.7 \pm 1.1$  |
| 3b            | $5.3 \pm 0.9$  |
| 3c            | $18.4 \pm 4.7$ |
| 3d            | $37.5 \pm 5.5$ |
| 3e            | $4.4 \pm 1.9$  |
| 3f            | $4.3 \pm 0.5$  |

Table 4 Size of nanoparticles from Figure 4

| Figure number | Size (nm)     |
|---------------|---------------|
| 4a            | $5.3 \pm 1.6$ |
| 4b            | $7.8 \pm 5.8$ |
| 4c            | $4.8 \pm 1.4$ |
| 4d            | $6.9 \pm 2.5$ |
| 4e            | $5.7 \pm 2.9$ |
| 4f            | $8.5 \pm 6$   |
| 4g            | $3.9 \pm 0.5$ |
| 4h            | $15 \pm 7$    |
| 4i            | $4.3 \pm 0.7$ |
| 4j            | $2.6 \pm 0.3$ |
| 4k            | $4.5 \pm 1.1$ |
| 4l            | $4.5 \pm 1.3$ |
